# Supplementary material
Source: publisher site journal article supplement (https://www.kjim.org/upload/media/kjim-2020-701-suppl16.pdf)
Supplement: Supplementary file 1 [file kjim-2020-701-suppl16.pdf]

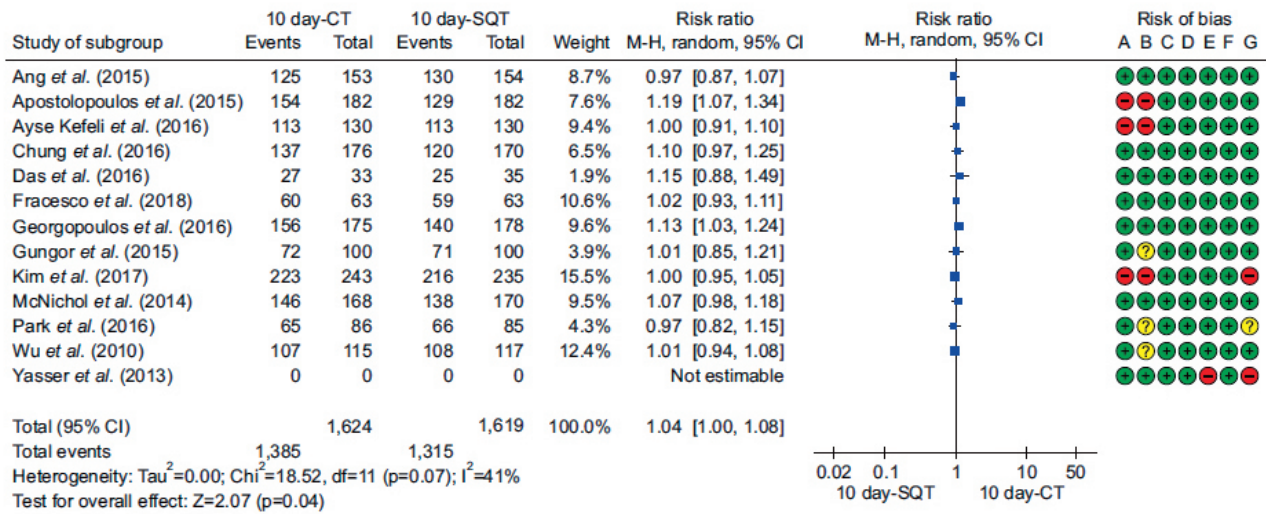

**A**

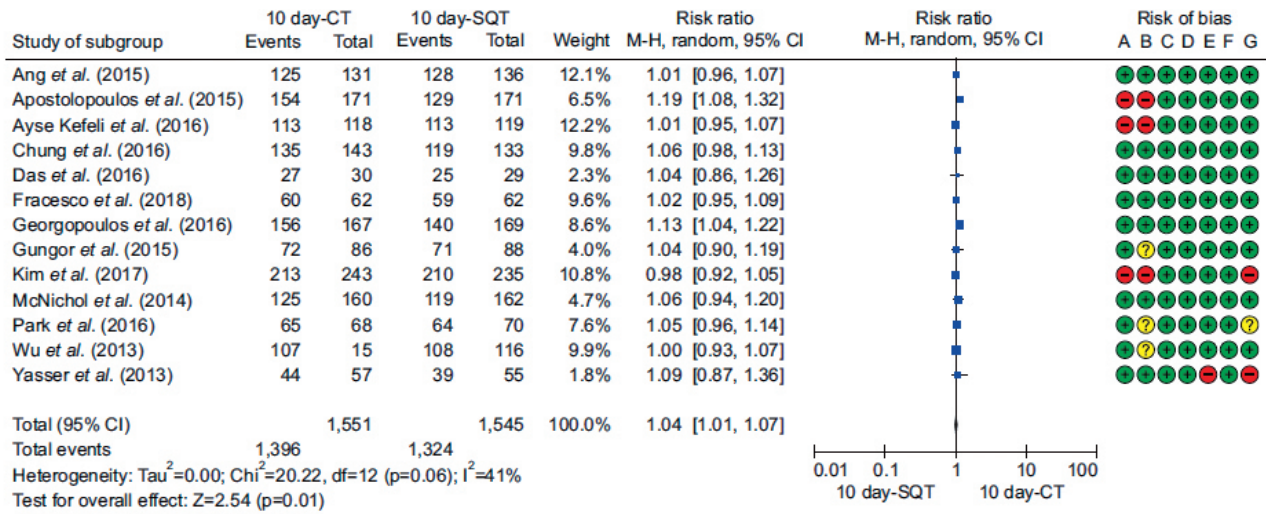

**B**

**Supplementary Figure 7.** Comparison between 10-day concomitant therapy and 10-day sequential therapy (A) intention-to-treat analysis (B) per protocol analysis. Risk of bias: A, random sequence generation (selection bias); B, allocation concealment (selection bias); C, blinding of participants and personnel (performance bias); D, blinding of outcome assessment (detection bias); E, incomplete outcome data (attrition bias); F, selective reporting (reporting bias); G, other bias. CT, concomitant therapy; SQT, sequential therapy; M-H, Mantel-Haenszel; CI, confidence interval.
